# Supplementary material
Source: PubMed Central journal article supplement (PMC4394321)
Supplement: pnas.201414841SI.pdf [file pnas.201414841SI.pdf]

# Supporting Information

Pnueli et al. 10.1073/pnas.1414841112

## SI Experimental Procedures

**ChIP.** For ChIP experiments,  $5 \times 10^6$ – $1 \times 10^7$  cells were cross-linked with 1% formaldehyde for 10 min, after which glycine (125 mM final concentration) was added for 5 min to quench the cross-linking. The cells were washed twice and then were collected in cold PBS. After centrifugation ( $1,000 \times g$  for 5 min), cells were lysed with 750  $\mu$ L lysis buffer [50 mM Hepes-KOH (pH 7.5), 140 mM NaCl, 1 mM EDTA (pH 8), 1% Triton X-100, 0.1% sodium deoxycholate, 0.1% SDS, protease inhibitors]. Cells then were sonicated 10 times (15-s pulses, 33% amplitude, 10 s between each pulse) using a Sonics Vibra-Cell sonicator while submerged in ice water. The cell debris was pelleted ( $10,000 \times g$  for 5 min), and 50  $\mu$ L of supernatant was removed to serve as the input. The remainder was immunoprecipitated by adding RIPA buffer (750  $\mu$ L), primary antibody (5  $\mu$ g), and protein G magnetic beads (20  $\mu$ L; 1004D Novex) with overnight incubation on a roller at 4 °C. After five washes, the samples were eluted (1% SDS, 100 mM NaHCO<sub>3</sub>). The cross-linking in the immunoprecipitated and input samples was reversed by incubation at 65 °C for 5 h, with the addition of 2  $\mu$ L RNase A (0.5 mg/mL), before purification using the PCR purification kit (28106; Qiagen). For Pitx1 ChIP,  $\alpha$ T3-1 cells were transfected with GFP or HA-Pitx1-encoding plasmids for 24 h before harvest, and samples then were processed similarly, except that they were eluted with HA peptide (Sigma). Real-time qPCR then was used to measure the levels of DNA, and the levels in the immunoprecipitated samples were normalized to those of the input. All primers used for qPCR amplification are given in Table S2.

Antibodies used in the ChIP experiments included H3K4me1 (AB8895), H3K4me3 (AB1012), H3K9me3 (AB8898), H3 (AB1791), and H3K27ac (AB4729), all from Abcam. In addition, the following were used: H3K27me3 (07-449; Millipore), CHD1 (4351; Cell Signaling), HA (HA.11 clone, MMS-101P; Covance), and Ago 1/2/3 (clone 2A8; Active Motif).

**Chromatin Conformation Capture Assay.** The chromatin conformation capture (3C) assay was carried out according to the published protocol (1). Gonadotrope precursor  $\alpha$ T3-1 cells ( $7 \times 10^7$  in  $10 \times 100$  mm plates, 70% confluent, for each 3C assay) were cultured as in ref. 2 and then were serum-starved overnight before some were treated with GnRH (100 nM, 2 h, in fresh serum-starved MEM medium). The medium was replaced with 10 mL fresh medium at room temperature before the addition of formaldehyde to a final concentration of 2% and incubation for 10 min at room temperature on a shaking platform. Glycine was added to a final concentration of 0.125 M, and the cells were incubated for another 5 min at room temperature on a shaking platform before holding on ice for 15 min. The medium was removed, and cells were collected into PBS, centrifuged ( $800 \times g$  for 10 min at 4 °C) before 1 mL of lysis buffer [10 mM Tris (pH 8), 10 mM NaCl, 0.2% Nonidet P-40] with 300  $\mu$ L of protease inhibitor mixture (P8340, Sigma) was added to the pellet. After 15 min on ice, the cells were Dounce homogenized (pestle B, on ice, 15 strokes, 1 min on ice, and 15 more strokes on ice), transferred to Eppendorf tubes, and spun down ( $2,000 \times g$  for 5 min at 4 °C). The pellet was washed with Dpn2  $\times$ 1 restriction buffer (New England Biolabs) and was spun again in the same way before being suspended with 350  $\mu$ L of Dpn2  $\times$ 1 restriction buffer and distributed to seven 50- $\mu$ L tubes. Dpn2  $\times$ 1 restriction buffer (312  $\mu$ L) and 1% SDS (38  $\mu$ L) were added to each tube and were incubated for 10 min at 65 °C. Triton X-100 (10%: 44  $\mu$ L) was added to each tube and was pipetted up and down before the addition of Dpn2 (400  $\mu$ L; New England Biolabs) and incubation at 37° overnight on a roller. On the next day, 10% SDS (86  $\mu$ L)

was added to each tube and was incubated for 30 min at 65 °C. Contents from tubes containing control or GnRH-treated cells were then combined separately into 50-mL tubes, to which were added 745  $\mu$ L of Triton X-100, 745  $\mu$ L of 10 $\times$  ligation buffer, 80  $\mu$ L of 10 mg/mL BSA, 6.04 mL of double-distilled water, and 7.5  $\mu$ L T4 ligase (400 U/ $\mu$ L). Tubes were incubated at 16 °C for 2 h before the addition of proteinase K (50  $\mu$ L of 10 mg/mL) and incubation overnight at 65 °C. On the next day, the same amount of proteinase K was added and incubated for 2 h at 42 °C; then 8 mL of phenol was added, vortexed for 2 min, and spun down ( $2,500 \times g$  for 5 min at room temperature). The upper phase was taken for phenol/chloroform extraction, vortexed for 2 min, and spun down ( $2,500 \times g$  for 5 min at room temperature). This upper phase was transferred to five Corex tubes (Corning), and 1/10 volume of 3 M Na acetate (pH 5.2) was added with 2.5 volumes of 100% ethanol. After incubation overnight at –80°, the tubes were centrifuged ( $12,000 \times g$  for 20 min at 4 °C), and the pellet was washed with 70% ethanol and was suspended in 400  $\mu$ L Tris EDTA (TE) before transfer to Eppendorf tubes for phenol/chloroform extraction and ethanol precipitation as before. Finally the pellet was washed five times with 70% ethanol, air dried, and resuspended in 100  $\mu$ L TE. RNase A (10 mg/mL; 1  $\mu$ L) was added for 15 min at 37 °C. Then the tubes were combined, and these libraries were diluted to 15 ng/ $\mu$ L in double-distilled water.

PCR was carried out to detect the chimeric fragments using 1  $\mu$ L of the library per 50- $\mu$ L reaction, nested forward primers targeting –239 and –221 bp upstream of the *Cga* TSS, and sets of primers targeting various parts of the upstream region spanning the enhancer, as shown in Fig. S7 and detailed in Table S2. The first round of PCR was performed at 55 °C over 35 cycles, and the second round was performed at 58 °C over 21 cycles. The control 3C on the *Fsh $\beta$*  gene was performed on the same libraries under identical conditions, with primers shown in Table S2. PCR products were resolved by gel electrophoresis, and the amplicons were verified by sequencing. Chimeric amplicons were measured by qPCR in two steps, the first as above, using the –239 bp primer and an upstream primer. The amplicons were purified using PCR purification kit (Qiagen), diluted 1:1,000, and 2  $\mu$ L was taken to a 60- $\mu$ L qPCR reaction (60 °C over 40 cycles), with the –221 bp proximal primer and the same upstream primer. Levels were quantitated according to standard curves using the same chimeric fragment that had been cloned into pGEM, and averages were made after repeating (*n*-value) both rounds of the PCR. Values are expressed relative to these standard curves in picograms of the chimeric fragment-containing plasmids.

**Stable Transfection and Selection.** Cells ( $\sim 1 \times 10^6$ ) were transfected with linearized pSUPER-GFP/neo plasmid containing the targeting sequence, using GenePorter2 (Genlantis). After 48 h, cells were trypsinized, diluted 1:50, and sown on 24-well plates. The following day, G418 was added to a final concentration of 500  $\mu$ g/mL, and this selection was maintained (3). The sequences used for targeting the shRNA are shown in Table S1. Notably the sequences do not match any other Ref-Seq genes in the database (BLAST; National Center for Biotechnology Information) except for sh120 which potentially could target *Cst6*, a secreted protease inhibitor; *Gngt1*, a noncanonical G protein involved in cell-cycle progression in neuronal cells (4); *Gdppg1*, a predicted glucose phosphorylase; or a noncoding RNA (6330549D23Rik) for which no information is available. It also matches a sequence in a gene predicted to encode a 660-like zinc finger (LOC102639251) and in two other miscellaneous RNAs (Gm 19343 and LOC102631952).



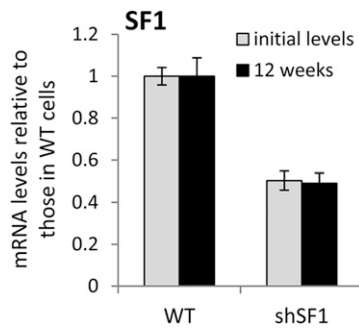

**Fig. S3.** Stable knockdown of SF1 does not progressively reduce *Sf1* mRNA levels beyond its initial effect.  $\alpha$ T3-1 cells were stably transfected with shRNA targeting *Sf1* mRNA (1) as described in *Experimental Procedures*. After completion of the initial selection and 12 wk later, the levels of mRNA were measured and compared with those in WT cells. Values normalized to mRNA levels of *Rplp0* are shown relative to those in WT cells. Data are shown as mean  $\pm$  SEM,  $n = 2-4$ .

1. Wijeweera A, et al. (2015) Gonadotropin gene transcription is activated by menin-mediated effects on the chromatin. *Biochim Biophys Acta* 1849(3):328-341.

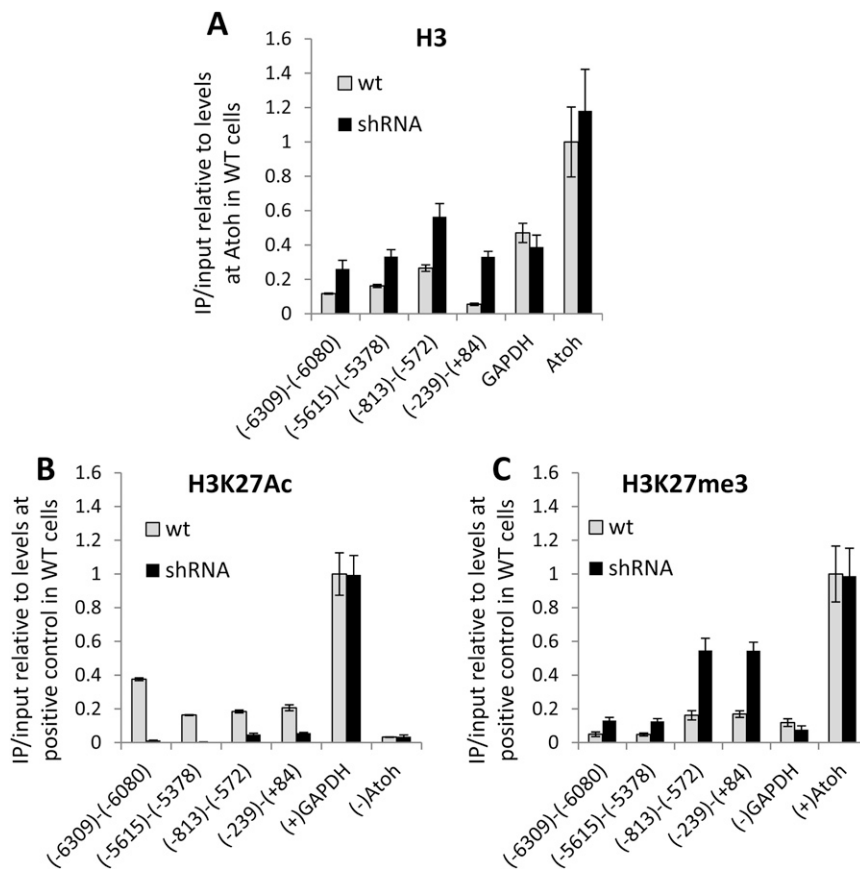

**Fig. S4.** Knockdown of the eRNA already affects the association and modifications of H3 at the enhancer and *Cga* promoter at 11 wk. Histone H3 (A) and its acetylation (B) or trimethylation (C) on Lys 27 were measured in WT and eRNA-knockdown (shRNA) cells after 11 wk using the sets of primers shown. The levels of immunoprecipitated DNA are presented relative to those at the positive controls in WT cells, after normalization to input samples. Data are shown as mean  $\pm$  SEM,  $n = 4$ .

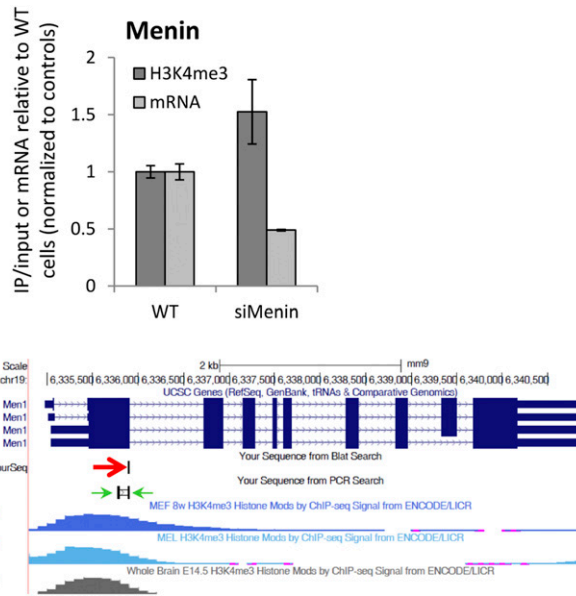

**Fig. S5.** Long-term stable transfection of shRNA targeting the 5' end of *Menin* mRNA does not alter H3K4me3 at this gene.  $\alpha$ T3-1 cells were stably transfected with shRNA targeting *Menin* mRNA (1), as described in *Experimental Procedures*. (Upper) At 10 wk after completion of the initial selection, the levels of H3K4me3 at the 5' end of the gene and levels of mRNA were measured and compared with those in WT cells. Data are shown as mean  $\pm$  SEM,  $n = 2-4$ . (Lower) The position of the mRNA target of the shRNA (large red arrow) and the ChIP PCR primers (pair of smaller green arrows), relative to the position of the gene and the peaks of H3K4me3 in various tissues and cell lines.

1. Wijeweera A, et al. (2015) Gonadotropin gene transcription is activated by menin-mediated effects on the chromatin. *Biochim Biophys Acta* 1849(3):328-341.

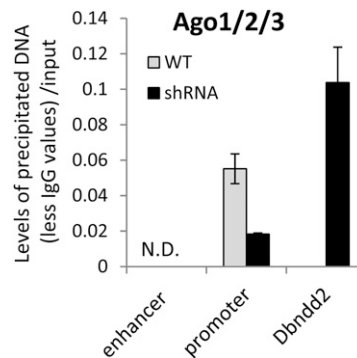

**Fig. S6.** Ago does not appear to accumulate at the region of the enhancer targeted by the shRNA. ChIP for Ago 1/2/3 was carried out in WT and eRNA-knockdown (shRNA) cells. The levels of immunoprecipitated *Cga* proximal promoter DNA are shown after subtraction of background (IgG) values and normalization to input samples; the distal enhancer was not detected (N.D.) above background in either cell line. Also shown are the levels at the *Dbndd2* gene promoter which was reported to associate with human Ago1 (1). Data are shown as mean  $\pm$  SEM,  $n = 2$ .

1. Huang V, et al. (2013) Ago1 Interacts with RNA polymerase II and binds to the promoters of actively transcribed genes in human cancer cells. *PLoS Genet* 9(9):e1003821.

## RT-PCR and RACE primers

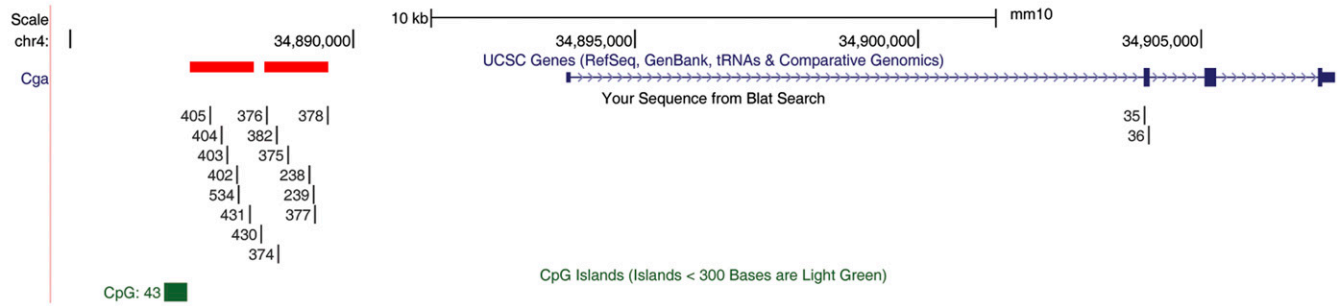

## 3C primers

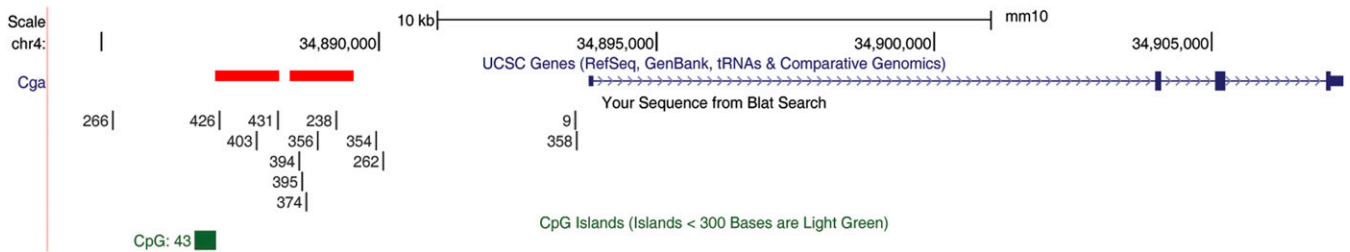

**Fig. S7.** Location of RT-PCR and RACE primers (*Upper*) and 3C primers (*Lower*) relative to the *Cga* gene. Numbers refer to primer numbers in Table S2. The red bars mark the transcribed region of the enhancer.

**Table S1. Sequences targeting shRNA knockdown**

| Target                         | Sequence            |
|--------------------------------|---------------------|
| eRNA-forward ( <i>sh180</i> )  | CAAAGTGGGTACTGGGAAT |
| eRNA-forward ( <i>sh1000</i> ) | GCACATAAATTCAGTCATA |
| eRNA-opposite ( <i>sh120</i> ) | GAGAAATCCTGTCTTGAAA |
| eRNA-opposite ( <i>sh632</i> ) | GGTGAAGGACAGTAGGAAA |
| <i>Pitx1</i>                   | CAACATCAACAACCTCACC |

**Table S2. Primers used in this study**

| Primer number | Position             | Sequence (5' to 3')       |
|---------------|----------------------|---------------------------|
| RT and qPCR   |                      |                           |
| 76            | GAPDH F              | ATGGTGAAGGTCGGTGTGAA      |
| 77            | GAPDH R              | TCCTGGAAGATGGTGTATGGG     |
| 35            | Cga 97 F             | ATGGATTACTACAGAAAATATGCAG |
| 36            | Cga 196 R            | CCTGAATAATAAAGTCTCCATCAGG |
| 238           | (-4559) F Cga        | TAGGTAAACGGTACCCTGCT      |
| 239           | (-4460) R Cga        | GATGCTAACTGGAGGCTGCA      |
| 374           | (-5100) F Cga        | TAACCCCTGGAAGAGTAGCCTG    |
| 375           | (-4908) R Cga        | TAGCCCTCCAGAAGCAGAGG      |
| 376           | (-5300) F Cga        | CTCTGATCACA AATTGAACA AGA |
| 377           | (-4460) F Cga        | CTCAAAGTACTCAGTGGAAAG     |
| 378           | (-4200) R Cga        | AACGGTGAAAGTTAAGCCAGAG    |
| 382           | (-5139) R Cga        | GCGTTACAATAACTTGTAAACC    |
| 402           | (-5800) R Cga        | CCTAAGTTGATGTCCTAGAATG    |
| 403           | (-6000) F Cga        | TGCACAGGCTCTATCAACTAG     |
| 404           | (-6080) R Cga        | GCACGCCAATTCAACTACGC      |
| 405           | (-6309) F Cga        | ATGTTTGATTGAACTCCGTGG     |
| 430           | (-5378) R Cga        | CCTATGGGTTGTGACCCCTT      |
| 431           | (-5615) F Cga        | AAATTTCCATGAAGCTTATAGACC  |
| 534           | (-5816) F Cga        | CTAGGACATCAACTTAGGAAAT    |
| 535           | (-5630) R Cga        | GCATGCCTTTAATCCCAGCA      |
| 184           | RPLP0 196 F          | GCGACCTGGAAGTCCAACATA     |
| 185           | RPLP0 296 R          | ATCTGCTTGGAGCCACAT        |
| 1             | $\beta$ actin F      | GCCATGTACGTAGCCATCCA      |
| 2             | $\beta$ actin R      | ACGCTCGGTGAGGATCTTCA      |
| 522           | USP44 ORF 736 F      | CCTACTTCGGAAGACAGGAC      |
| 523           | USP44 ORF 885 R      | GCCTTTCTCTTTCTCTTGCC      |
| 326           | Tet1 5086 F          | GAGCCTGTTCCTCGATGTGG      |
| 327           | Tet1 5287 R          | CAAACCCACCTGAGGCTGTT      |
| 294           | Tet3 3393 F          | GAGCACGCCAGAGAAGATCAA     |
| 295           | Tet3 3492 R          | CAGGCTTTGCTGGGACAATC      |
| 550           | SF1 1348 F           | AAATTCCTGAACACACAGCAG     |
| 551           | SF1 1570 R           | GCATCTCAATGAGAAGGTTG      |
| 923           | Pitx1 exon3 F        | TGGAGGCCACGTTCCAAAG       |
| 924           | Pitx1 exon3 R        | GTCTTTGAACCCAGACCCGCAC    |
| 13            | c-jun 1633 F         | CTGAAGGAAGAGCCGAGACC      |
| 14            | c-jun 1870 R         | GTTCCCTGAGCATGTTGGCCG     |
| 80            | ER $\alpha$ 745 F    | CTGTGCCGTGTGCAATGACT      |
| 81            | ER $\alpha$ 924 R    | CATGCCCACTTCGTAACACT      |
| 778           | GnRHR 471 F          | GTCTATGATCAGCCTGGCCT      |
| 779           | GnRHR 610 R          | ACTGTGGAAAGCTGCAGTGG      |
| 415           | GAPDH(-226) F        | GGAAGCAGCATTGAGGCTCTC     |
| 416           | GAPDH (-148) R       | CAGGATAGGACTCAGGGAATACAG  |
| 286           | Atoh1 (-355) F       | CCCTCACTCAGGTCGCTG        |
| 287           | Atoh1 (-148) R       | CGTGCGAGGAGCCAATCA        |
| 121           | Crystallin (1735) R  | GTGAATCTCCAAAAATCCT       |
| 122           | Crystallin (1381) F  | AGGACACACCAGCTTCTTG       |
| 1,129         | gtbp1 +185 F         | AGCTGGACCTCACCAGCAAG      |
| 1,130         | gtbp1 +323 R         | TGCATCCCTCAGCGCTCC        |
| 205           | Fsh $\beta$ (-161) F | ttctgctctgtggcatttaga     |
| 38            | Fsh $\beta$ (-66) R  | CCAATACCAACATAAAGCCTGCTG  |
| 571           | Lh $\beta$ (-980) R  | CACAGGCTCACCTTGTGAAG      |
| 549           | Lh $\beta$ (-1229) F | CCACTAAGTGTGGATAGG        |
| 612           | Lh $\beta$ (-3180) R | TGATCTACTTACTCGCACAC      |
| 546           | Lh $\beta$ (-3359) F | TTGAGTGTTTTTGCTGCATG      |
| 624           | Tet1 enhancer F      | GTGTAAGCCACAAGCCAGT       |
| 625           | Tet1 enhancer R      | GCATATCCCAAGGTAAGATAG     |
| 1,147         | Major Satellites F   | GACGACTTGAAAAATGACGAAATC  |
| 1,148         | Major Satellites R   | CATATTCAGGTCCTTCAGTGTGC   |
| 1,145         | Menin ORF F (ChIP)   | TATCCTCGAGAGGGAGGTGTT     |
| 1,146         | Menin ORF R (ChIP)   | CTGTGATGAAGCTGAAGAGGGA    |
| 449           | Men CDS (ORF 1082) R | GTAGATCTCCTCATCCTCCC      |
| 452           | Men CDS (ORF 908) F  | ACCCACTCACCTTTATCAC       |

**Table S2. Cont.**

| Primer number                       | Position                           | Sequence (5' to 3')        |
|-------------------------------------|------------------------------------|----------------------------|
| 1,141                               | Dbnnd2 F                           | AACTTGGGTGCCCTCCT          |
| 1,142                               | Dbnnd2 R                           | AGGGAAATGGAGAACGAACG       |
| <b>RACE primers</b>                 |                                    |                            |
| 406                                 | For 5' forward eRNA (-4794) R      | CTGTATGCAACACAGTAAGTGGTTC  |
| 400                                 | 5' forward inner primer (-5070) R  | GGTAAGAGCACAGGCTACTC       |
| 407                                 | For 3' forward eRNA (-4525) F      | TGCAGCTGATCCGCCTGACCAAG    |
| 381                                 | 3' forward inner primer (-4200) F  | TTGTTACCAGCTTGCAGGGTC      |
| 412                                 | For 5' opposite eRNA (-6309) F     | ATGTTTGATTGAACTCCGTGGCAGAA |
| 403                                 | 5' opposite inner primer (-6000) F | TGCACAGGCTCTATCAACTAG      |
| 411                                 | For 3' opposite eRNA (-6080) R     | GCACGCCAATTCAACTACGCTACAG  |
| 413                                 | 3' opposite inner primer (-6170) R | AATTAGCGATGGCTTAGTTG       |
| <b>3C PCR primers-Cga</b>           |                                    |                            |
| 9                                   | (-239) F                           | GCCAAATGCTCTCTTTCATAAGC    |
| 238                                 | (-4559) F                          | TAGGTAAACGGTACCCTGCT       |
| 262                                 | (-3721) F                          | CTGCAGTCTAGGAGATTTGAAC     |
| 266                                 | (-8599) F                          | TTGCTAGTTTTCCAGAAGACCA     |
| 354                                 | (-3847) F                          | CTTCAGCAATCTTCTCAGACTC     |
| 356                                 | (-4908) F                          | AGAATTACAATCACAGCACACC     |
| 358                                 | (-221) F                           | CATAAGCTGTCTTGAGGTCAC      |
| 374                                 | (-5100) F                          | TAACCCTGGAAGAGTAGCCTG      |
| 394                                 | (-5220) F                          | GATGTTTTACCTGCATGTATGTC    |
| 395                                 | (-5170) F                          | AGTGGCTAGAAGAGGACATC       |
| 403                                 | (-6000) F                          | TGCACAGGCTCTATCAACTAG      |
| 426                                 | (-6665) F                          | CCGCCGCTCATCTGCTAAAA       |
| 431                                 | (-5615) F                          | AAATTTCCATGAAGCTTATAGACC   |
| <b>3C PCR primers-Fshb</b>          |                                    |                            |
| 236                                 | Proximal-nested                    | GAAGCACCTCTGTGTGGTAA       |
| 237                                 | Proximal                           | CTTACCATTGGCCCTAAATTAG     |
| 601                                 | Upstream                           | GGGTGTGTCTGTGACCTC         |
| <b>Bisulfite sequencing primers</b> |                                    |                            |
| 748                                 | (-6903) F BS left                  | GAGTTGTTTTAGTTGGTTATATAGTT |
| 749                                 | (-6672) F BS right                 | CCCAAATCTCCAATCTTCTTAAATAC |
| 750                                 | (-7175) F BS left                  | TGGTATTATAAGGGTTTTTAGGTAGT |
| 757                                 | (-6903) F BS right                 | AACTATATAACCAACTAAAACAATC  |

F, forward; R, reverse.
